# Supplementary material for: Key Stratification of Microbiota Taxa and Metabolites in the Host Metabolic Health–Disease Balance
Source: MDPI journal article supplement (doi:10.3390/ijms24054519), 2023-02-24
Supplement: s1 [file s1]

**Supplementary material S2.** Microbiota metabolite modifications and microbiota variation in several pathologies. \*Gut microbiota-metabolite correlation +/-

| Ref., Sample size, Biosample                                                                                             | Gut microbiota taxa modification           | Metabolite modifications                                                                                                                                                                                                                                                                                                                                                                                | * | Health status |
|--------------------------------------------------------------------------------------------------------------------------|--------------------------------------------|---------------------------------------------------------------------------------------------------------------------------------------------------------------------------------------------------------------------------------------------------------------------------------------------------------------------------------------------------------------------------------------------------------|---|---------------|
| [103]<br>Northern Finland Birth Cohort <i>n</i> = 12,058; microbiome <i>n</i> = 563; metabolome <i>n</i> = 340<br>Faeces | <i>Blautia</i>                             | N-Acetilalanine, Ursodeoxycholate, N6,N6,N6-Trimethyllysine, 7-                                                                                                                                                                                                                                                                                                                                         | + | NW            |
|                                                                                                                          | <i>Ruminococcus</i>                        | Methylguanine, Isoursodeoxycholate, Deoxycholate, N-Propionylalanine                                                                                                                                                                                                                                                                                                                                    | + | OW            |
|                                                                                                                          | <i>Blautia</i>                             | Cholate sulfate, Dihomo-linolenate (20:3n3 or n6), 5α-Androstan-3α,17α-diol disulfate, Homocitrulline, Androsterone sulfate, Palmitoylcarnitine (C16), Propionylglutamine, Isoursodeoxycholate, 5α-Androstan-3α,17β-diol monosulfate, Deoxycholate, 2-Acetamidobutanoate, Phytosphingosine, N-Propionylalanine, Oleoylcarnitine (C18:1), Oleoyl ethanolamide, Glycodeoxycholate, N6-Carboxymethyllysine | + | OW            |
|                                                                                                                          | <i>Roseburia</i>                           | Bilirubin (E,Z or Z,E), I-Urobilinogen, D-Urobilin, Stearoyl ethanolamide, N1-Methyl-2-pyridone-5-carboxamide, 7-Methylguanine, Carnosine, 2-Hydroxyadipate, Thymidine                                                                                                                                                                                                                                  | + | OW            |
|                                                                                                                          | <i>Oscillospira</i>                        | Nicotinate, Pantothenate                                                                                                                                                                                                                                                                                                                                                                                | + | OW            |
|                                                                                                                          | <i>Eggerthella</i>                         | Cholate sulfate                                                                                                                                                                                                                                                                                                                                                                                         | + | OW            |
|                                                                                                                          | <i>Haemophilus</i>                         | 5α-Androstan-3β,17β-diol monosulfate, Pregnenolone steroid monosulfate, Pregnenolone sulfate                                                                                                                                                                                                                                                                                                            | + | OW            |
|                                                                                                                          | <i>Veillonella</i>                         | Ribonate                                                                                                                                                                                                                                                                                                                                                                                                | + | OW            |
|                                                                                                                          |                                            | Arabonate/xylonate                                                                                                                                                                                                                                                                                                                                                                                      | + | OW            |
|                                                                                                                          |                                            |                                                                                                                                                                                                                                                                                                                                                                                                         |   |               |
| [104]<br><i>n</i> = 33; OB/NoPCOS <i>n</i> = 15; OB/PCOS <i>n</i> = 18<br>Faeces                                         | <i>Parabacteroides</i>                     | Teasterone                                                                                                                                                                                                                                                                                                                                                                                              | + | OB/PCOS       |
|                                                                                                                          | <i>Veillonella</i>                         | Arachidonic acid, 8,11,14-Eicosatrienoic acid, Docosahexaenoic acid, Adrenic acid                                                                                                                                                                                                                                                                                                                       | + |               |
|                                                                                                                          | <i>Lachnospira</i>                         | Taurocholic acid                                                                                                                                                                                                                                                                                                                                                                                        | - |               |
|                                                                                                                          |                                            | Arachidonic acid, 8,11,14-Eicosatrienoic acid, Docosahexaenoic acid, Adrenic acid                                                                                                                                                                                                                                                                                                                       | + |               |
|                                                                                                                          |                                            | Taurocholic acid                                                                                                                                                                                                                                                                                                                                                                                        | - |               |
|                                                                                                                          | <i>Fusobacterium</i>                       | Teasterone                                                                                                                                                                                                                                                                                                                                                                                              | - |               |
|                                                                                                                          | <i>Lachnoclostridium</i>                   | Teasterone                                                                                                                                                                                                                                                                                                                                                                                              | - |               |
|                                                                                                                          | <i>Eubacterium coprostanoligenes</i> group | Teasterone                                                                                                                                                                                                                                                                                                                                                                                              | + |               |

|                                                |                                      |                                                                         |   |         |
|------------------------------------------------|--------------------------------------|-------------------------------------------------------------------------|---|---------|
|                                                | <i>Ruminococcaceae</i> UCG-002       | Teasterone                                                              | + |         |
|                                                | <i>Erysipelotrichaceae</i> UCG-003   | Dehydroepiandrosterone-sulfate                                          | - |         |
|                                                | <i>Lachnospiraceae</i> NK4A136 group | Teasterone                                                              | + |         |
|                                                | norank <i>Muribaculaceae</i>         | Dehydroepiandrosterone-sulfate                                          | + |         |
| [105]                                          | <i>Akkermansia</i>                   | Indolepropionate                                                        | + | LH      |
| <i>n</i> = 1280; LH <i>n</i> =                 | <i>Barnesiella</i>                   | Valine                                                                  | + | LH      |
| 633; ObH <i>n</i> = 494; <i>Clostridium</i> IV |                                      | Tyrosine                                                                | + | LH      |
| ObT2D <i>n</i> = 153                           |                                      | Isovalerate, Glutamine, Oxalate                                         | - | LH      |
| <i>n</i> = 400; LH <i>n</i> =                  | <i>Clostridium</i> XIVa              | Phenylalanine, Glycylvaline                                             | + | LH      |
| 228; ObH <i>n</i> = 145;                       |                                      | Glutamine, 3-Phenylpropionate, Inosine                                  | - | LH      |
| ObT2D <i>n</i> = 27                            | <i>Prevotella</i>                    | 3-Phenylpropionate                                                      | + | LH      |
| subset                                         | <i>Intestimonas</i>                  | N1-Methyl-2-pyridone-5-carboxamide                                      | + | LH      |
| Serum                                          | <i>Barnesiella</i>                   | Docosapentaenoate                                                       | - | LH      |
|                                                | <i>Butyricicoccus</i>                | 1-Stearoyl-GPE (18:0)                                                   | + | LH      |
|                                                | <i>Anaerovorax</i>                   | 2-Methylbutyrylcarnitine                                                | + | LH      |
|                                                |                                      | Adrenate (22:4n6), Epiandrosterone sulfate                              | - | ObH     |
|                                                | <i>Parabacteroides</i>               | Indolepropionate, 1-Linoleoyl-GPC (18:2), 1-Dihomo-linoleoyl-GPC (20:2) | + | ObH     |
|                                                |                                      | 10-Heptadecenoate (17:1n7)                                              | - | LH      |
|                                                | <i>Ruminococcus</i>                  | Gamma-CEHC                                                              | + | ObH     |
|                                                |                                      | 1-Arachidonoyl-GPI (20:4)                                               | - | LH      |
|                                                | <i>Odoribacter</i>                   | Indolepropionate, 3-Phenylpropionate                                    | + | ObH     |
|                                                |                                      | Glycylvaline                                                            | - | LH      |
|                                                | <i>Butyricimonas</i>                 | 3-Phenylpropionate, 2-Linoleoyl-GPC (18:2), 1-Linoleoyl-GPC (18:2)      | + | ObH     |
|                                                | <i>Oscillibacter</i>                 | Citrulline, 1-Oleoyl-GPC (18:1), Cinnamoylglycine                       | + | ObH     |
|                                                | <i>Anaerotruncus</i>                 | 1-Linoleoyl-GPC (18:2)                                                  | + | ObH     |
| [106]                                          | <i>Fusobacterium varium</i>          | Leucine, Glutamate                                                      | + | OB MLGs |
| <i>n</i> = 151; LC <i>n</i> = 79;              | <i>Fusobacterium ulcerans</i>        | Leucine, Glutamate                                                      | + | OB MLGs |
| OB <i>n</i> = 72                               | <i>Ruminococcus torques</i>          | Glutamate, Phenylalanine                                                | + | OB MLGs |
|                                                | <i>Dorea longicatena</i>             | Phenylalanine, Glutamate                                                | + | OB MLGs |

|                                                                       |                                     |                                                                 |   |              |
|-----------------------------------------------------------------------|-------------------------------------|-----------------------------------------------------------------|---|--------------|
| Serum                                                                 |                                     | Glutamine                                                       | - | OB MLGs      |
|                                                                       | <i>Eubacterium hallii</i>           | Glutamate                                                       | + | OB MLGs      |
|                                                                       | <i>Ruminococcus spp.</i>            | Glutamate                                                       | + | OB MLGs      |
|                                                                       |                                     | Glutamine                                                       | - | OB MLGs      |
|                                                                       | <i>Coprococcus comes</i>            | Glutamate                                                       | + | OB MLGs      |
|                                                                       |                                     | Glutamine                                                       | - | OB MLGs      |
|                                                                       | <i>Lachnospiraceae bacterium</i>    | Leucine, Glutamate, Phenylalanine                               | + | OB MLGs      |
|                                                                       | <i>Bacteroides spp.</i>             | Valine, Leucine, Isoleucine, Phenylalanine, Tyrosine, Glutamate | - | Control MLGs |
|                                                                       | <i>Veillonella spp.</i>             | Glutamate                                                       | - | Control MLGs |
|                                                                       | <i>Haemophilus parainfluenzae</i>   | Glutamate                                                       | - | Control MLGs |
|                                                                       | <i>Bacteroides thetaiotaomicron</i> | Valine, Leucine, Phenylalanine, Tyrosine, Glutamate             | - | Control MLGs |
|                                                                       | <i>Bacteroides ovatus</i>           | Valine, Phenylalanine, Tyrosine, Glutamate                      | - | Control MLGs |
|                                                                       | <i>Bacteroides intestinalis</i>     | Valine, Leucine, Isoleucine, Phenylalanine, Tyrosine, Glutamate | - | Control MLGs |
|                                                                       | <i>Holdemania filiformis</i>        | Valine, Leucine                                                 | - | Control MLGs |
|                                                                       | <i>Faecalibacterium prausnitzii</i> | Valine, Leucine, Isoleucine, Phenylalanine, Glutamate           | - | Control MLGs |
|                                                                       | <i>Clostridiales bacterium</i>      | Valine, Isoleucine, Phenylalanine, Tyrosine, Glutamate          | - | Control MLGs |
|                                                                       | <i>Anaerotruncus colihominis</i>    | Valine, Leucine, Isoleucine, Phenylalanine                      | - | Control MLGs |
|                                                                       | <i>Bacteroides uniformis</i>        | Valine, Leucine, Phenylalanine, Tyrosine                        | - | Control MLGs |
|                                                                       | <i>Klebsiella pneumoniae</i>        | Glutamate                                                       | - | Control MLGs |
|                                                                       | <i>Dialister invisus</i>            | Valine, Phenylalanine, Glutamate                                | - | Control MLGs |
|                                                                       | <i>Alistipes spp.</i>               | Tyrosine                                                        | - | Control MLGs |
|                                                                       | <i>Alistipes putredinis</i>         | Valine, Leucine                                                 | - | Control MLGs |
|                                                                       | <i>Bacteroides xylanisolvens</i>    | Valine                                                          | - | Control MLGs |
|                                                                       | <i>Akkermansia muciniphila</i>      | Phenylalanine                                                   | - | Control MLGs |
|                                                                       | <i>Odoribacter splanchnicus</i>     | Phenylalanine                                                   | - | Control MLGs |
|                                                                       | <i>Alistipes shahii</i>             | Tyrosine                                                        | - | Control MLGs |
| [107]<br><i>n</i> = 16; NW <i>n</i> = 8;<br>OB <i>n</i> = 8<br>Faeces | Enterococcaceae                     | Octadecenoic acid (Diet), N-Acetyl-DOPA(Gut-Brain)              | + | ND, ↓ OB     |
|                                                                       | Enterobacteriaceae                  | Octadecenoic acid (Diet)                                        | + | ND           |
|                                                                       |                                     | Ascorbic acid (Diet)                                            | - | ND           |
|                                                                       | Christensenellaceae                 | Azelaic acid (Diet), Suberic acid (Diet)                        | + | ND, ↓ OB     |

|                              |                                                                                         |   |                |
|------------------------------|-----------------------------------------------------------------------------------------|---|----------------|
| Succinivibrionaceae          | Suberic acid (Diet)                                                                     | + | ↓ OB           |
| Coriobacteriaceae            | Deoxycholic acid (Liver)                                                                | + | ↑ OB           |
| Propionibacteriaceae         | Urobilin (Liver), Deoxycholic acid (Liver)                                              | + | ND, ↑ OB       |
| Synergistaceae               | Deoxycholic acid (Liver)                                                                | + | ↑ OB           |
| Erysipelotrichaceae          | Dimethyl-2-oxoglutarate (Gut-Endogen)                                                   | + | ↓ OB           |
|                              | Ascorbic acid (Diet)                                                                    | - | ND             |
| Ruminococcaceae              | Dimethyl-2-oxoglutarate (Gut-Endogen)                                                   | + | ↓ OB           |
|                              | Tripeptide (Diet)                                                                       | - | ↑ OB           |
| Prevotellaceae               | Ascorbic acid (Diet)                                                                    | + | ND             |
| Clostridiaceae               | Hydroxyhexadecanedioic acid (Diet)                                                      | + | ND             |
| Rhodobacteraceae             | Hydroxyhexadecanedioic acid (Diet), Azelaic acid (Diet)                                 | + | ND, ND         |
| Desulfovibrionaceae          | Hydroxyhexadecanedioic acid (Diet), Azelaic acid (Diet)                                 | + | ND, ND         |
| Streptococcaceae             | N-Acetyl-DOPA (Gut-Brain)                                                               | - | ↓ OB           |
| Porphyromonadaceae           | Hydroxyphenyl propionic acid (Diet), Tripeptide (Diet), 12-ketodeoxycholic acid (Liver) | + | ND, ↑ OB, ↑ OB |
| DeFluviitaleaceae            | Hydroxyphenyl propionic acid (Diet), Tripeptide (Diet), 12-ketodeoxycholic acid (Liver) | + | ND, ↑ OB, ↑ OB |
| Staphylococcaceae            | Homovanillic acid (Gut-Brain)                                                           | + | ND             |
| Alcaligenaceae               | Rosmarinic acid (Diet), Quinic acid (Diet), Homovanillic acid (Gut-Brain)               | + | ND, ND, ND     |
| Helicobacteraceae            | Homovanillic acid (Gut-Brain)                                                           | + | ND             |
| Bacteroidaceae               | Quinic acid (Diet), Tripeptide (Diet), Homovanillic acid (Gut-Brain)                    | + | ND, ↑ OB, ND   |
|                              | Dimethyl-2-oxoglutarate (Gut-Endogen), Suberic acid (Diet), Urobilin (Liver)            | - | ↓ OB, ↓ OB, ND |
| U. m. of Clostridiales order | Dimethyl-2-oxoglutarate (Gut-Endogen), N-Acetyl-DOPA (Gut-Brain)                        | + | ↓ OB, ↓ OB     |
| U. m. of Bacteroidales order | Hydroxyphenyl propionic acid (Diet), Tripeptide (Diet), 12-ketodeoxycholic acid (Liver) | + | ND, ↑ OB, ↑ OB |
| Tenericutes                  | Suberic acid (Diet)                                                                     | + | ↓ OB           |
| Firmicutes                   | Dimethyl-2-oxoglutarate (Gut-Endogen)                                                   | + | ↓ OB           |

|                                                                                             |                         |                                                                            |   |              |
|---------------------------------------------------------------------------------------------|-------------------------|----------------------------------------------------------------------------|---|--------------|
|                                                                                             |                         | Quinic acid (Diet), Tripeptide (Diet), Urobilin (Liver)                    | - | ND, ↑ OB, ND |
| Bacteroidetes                                                                               |                         | Tripeptide (Diet)                                                          | + | ↑ OB         |
|                                                                                             |                         | Dimethyl-2-oxoglutarate (Gut-Endogen), Suberic acid (Diet)                 | - | ↓ OB, ↓ OB   |
| [108]<br><i>n</i> = 100; HC <i>n</i> = 35; T2D+ <i>n</i> = 49; T2D- <i>n</i> = 16<br>Faeces | <i>Enhydrobacter</i>    | LDL cholesterol                                                            | + | T2D+         |
|                                                                                             | <i>Acinetobacter</i>    |                                                                            |   |              |
|                                                                                             | <i>Pseudomonas</i>      |                                                                            |   |              |
|                                                                                             | <i>Aeromonas</i>        |                                                                            |   |              |
|                                                                                             | <i>Providencia</i>      |                                                                            |   |              |
|                                                                                             | M5                      |                                                                            |   |              |
|                                                                                             | <i>Akkermansia</i>      | HDL cholesterol                                                            | + | HC           |
|                                                                                             | MM12                    |                                                                            |   |              |
|                                                                                             | <i>Sarcina</i>          | Cholic acid                                                                | - | HC           |
|                                                                                             | Mollicutes              |                                                                            |   |              |
|                                                                                             | Tenericutes             |                                                                            |   |              |
|                                                                                             | MM13                    |                                                                            |   |              |
|                                                                                             | <i>Solibacillus</i>     | Acetate, Glycoursodeoxycholic acid, Chenodeoxyglycocholate                 | - | HC           |
|                                                                                             | <i>Oligella</i>         |                                                                            |   |              |
|                                                                                             | <i>Epulopiscium</i>     |                                                                            |   |              |
|                                                                                             | <i>Parapusillimonas</i> |                                                                            |   |              |
|                                                                                             | <i>Psychrobacter</i>    |                                                                            |   |              |
|                                                                                             | <i>Flavobacterium</i>   |                                                                            |   |              |
|                                                                                             | MM14                    |                                                                            |   |              |
|                                                                                             | <i>Shuttleworthia</i>   | Palmitoylcarnitine, Diacylglycerol (15:0/18:3), Diacylglycerol (15:0/20:3) | + | T2D+         |
|                                                                                             | <i>Peptoniphilus</i>    |                                                                            |   |              |
|                                                                                             | <i>Atopobium</i>        |                                                                            |   |              |
|                                                                                             | <i>Anaerococcus</i>     |                                                                            |   |              |
|                                                                                             | MM15                    |                                                                            |   |              |
|                                                                                             | <i>Allisonella</i>      | Lysophosphatidylcholine (18:2), Phosphatidylcholine (16:0/17:0)            | + | T2D+         |
|                                                                                             | <i>Ochrobactrum</i>     |                                                                            |   |              |
|                                                                                             | <i>Butyricicoccus</i>   |                                                                            |   |              |
|                                                                                             | <i>Anaerostipes</i>     |                                                                            |   |              |

|                                                                                                 |                                        |                                                                                                                                                                         |   |             |
|-------------------------------------------------------------------------------------------------|----------------------------------------|-------------------------------------------------------------------------------------------------------------------------------------------------------------------------|---|-------------|
|                                                                                                 | <hr/>                                  |                                                                                                                                                                         |   |             |
|                                                                                                 | <i>Ruminococcus toques</i> group       |                                                                                                                                                                         |   |             |
|                                                                                                 | MM16                                   |                                                                                                                                                                         |   |             |
|                                                                                                 | <i>Veillonella</i>                     | Linolenic acid, Lysophosphatidylcholine (18:2)                                                                                                                          | + | T2D+        |
|                                                                                                 | <i>Weissella</i>                       |                                                                                                                                                                         |   |             |
|                                                                                                 | <i>Pseudobutyrvibrio</i>               |                                                                                                                                                                         |   |             |
|                                                                                                 | <i>Streptococcus</i>                   | Butyrate                                                                                                                                                                | - |             |
|                                                                                                 | <i>Prevotellaceae</i> UCG-003          |                                                                                                                                                                         |   |             |
|                                                                                                 | MM19                                   |                                                                                                                                                                         |   |             |
|                                                                                                 | <i>Blautia</i>                         | HDL cholesterol                                                                                                                                                         | - | T2D-        |
|                                                                                                 | <i>Marvinbryantia</i>                  |                                                                                                                                                                         |   |             |
|                                                                                                 | <i>Lachnospiraceae</i> NK4A136 group   |                                                                                                                                                                         |   |             |
|                                                                                                 | MM32                                   |                                                                                                                                                                         |   |             |
|                                                                                                 | <i>Morganella</i>                      | Acetate, Butyrate, Glycocholic acid, Cholic acid                                                                                                                        | - | HC          |
|                                                                                                 | <i>Campylobacter</i>                   |                                                                                                                                                                         |   |             |
|                                                                                                 | MM34                                   |                                                                                                                                                                         |   |             |
|                                                                                                 | <i>Lactococcus</i>                     | Palmitoylcarnitine, Lysophosphatidylcholine (18:2),                                                                                                                     | + | T2D+        |
|                                                                                                 | <i>Prevotella</i>                      | Phosphatidylcholine (16:0/17:0)                                                                                                                                         |   |             |
|                                                                                                 | MM35                                   |                                                                                                                                                                         |   |             |
|                                                                                                 | <i>Eubacterium oxidoreducens</i> group | Glycoursodeoxycholic acid, Chenodeoxyglycocholate, Glycocholic-                                                                                                         |   | HC          |
|                                                                                                 | <i>Prevotellaceae</i> NK3B31 group     | acid                                                                                                                                                                    |   |             |
|                                                                                                 | MM38                                   |                                                                                                                                                                         |   |             |
|                                                                                                 | <i>Neisseria</i>                       | Cholic acid                                                                                                                                                             | + | T2D+        |
|                                                                                                 | MM40                                   |                                                                                                                                                                         |   |             |
| [109]<br><i>n</i> = 60; NGT <i>n</i> =<br>20; T2D <i>n</i> = 20;<br>IGR <i>n</i> = 20<br>Faeces | <i>Blautia</i>                         | PA (O-16:0/12:0), 24-Nor-9,11-seco-11-acetoxy-3,6-<br>dihydroxycholest-7,22-dien-9-one, Matricin, 8Z-Decen-4,6-diynoic<br>acid, Docosanedioic acid, Methyl, Ikarisoside | - | T2D vs. IGR |
|                                                                                                 | <i>Coproccoccus</i> 3                  | Matricin, (6S)-Dehydrovomifoliol                                                                                                                                        | - | T2D vs. IGR |
|                                                                                                 | <i>Lactobacillaceae</i>                | 14,15-HxA3-D (11S), Cytochalasin, Tanariflavanone                                                                                                                       | - | T2D vs. IGR |
|                                                                                                 | <i>Subdoligranulum</i>                 | PA (O-16:0/12:0), 24-Nor-9,11-seco-11-acetoxy-3,6-<br>dihydroxycholest-7,22-dien-9-one, Tanariflavanone                                                                 | - | T2D vs. IGR |

|                                      |                                                                                                                                                                                                                                                                                                                                                                            |   |             |
|--------------------------------------|----------------------------------------------------------------------------------------------------------------------------------------------------------------------------------------------------------------------------------------------------------------------------------------------------------------------------------------------------------------------------|---|-------------|
| <i>Prebotella</i> 9                  | PA (O-16:0/12:0), 24-Nor-9,11-seco-11-acetoxy-3,6-dihydroxycholest-7,22-dien-9-one                                                                                                                                                                                                                                                                                         | + | T2D vs. IGR |
| <i>Bacteroides</i>                   | PI (O-20:0/18:0), 3Z,6Z,9Z,12Z,15Z,19Z,22Z,25Z,28Z-Hentriacontanonaene, 10Z-Pentacosene, SM (d18:1/25:0), TG (13:0/17:1(9Z)/17:1(9Z))[iso3], GlcCer (d18:1/20:0), SM (d18:1/24:0), GlcCer (d18:2/23:0), TG (15:0/15:0/15:0), 1 $\alpha$ ,25-Dihydroxy-22-oxavitamin, 3-O-( $\beta$ -D-glucopyranosyl-(1 $\rightarrow$ 6)- $\beta$ -D-glucopytanosyl), Diamino-pimelic acid | + | T2D vs. IGR |
| <i>Fusicatenibater</i>               | 24-Nor-9,11-seco-11-acetoxy-3,6-dihydroxycholest-7,22-dien-9-one -                                                                                                                                                                                                                                                                                                         | - | T2D vs. IGR |
| <i>Faecalibacterium</i>              | 17-Oxo-octadecanoic                                                                                                                                                                                                                                                                                                                                                        | + | T2D vs. IGR |
|                                      | PA (O-16:0/12:0), 24-Nor-9,11-seco-11-acetoxy-3,6-dihydroxycholest-7,22-dien-9-one, PC (O-12:0/O-2:0)                                                                                                                                                                                                                                                                      | - | T2D vs. IGR |
| <i>Dorea</i>                         | 26,26,26,27,27,27-Hexafluoro-25-hydroxy-23,23,24,24-tetrahydrovitamin                                                                                                                                                                                                                                                                                                      | - | T2D vs. IGR |
| <i>Rummicococcus torques</i> group   | LysoPC (15:0), 17-Oxo-octadecanoic                                                                                                                                                                                                                                                                                                                                         | + | T2D vs. IGR |
| <i>Lachnospiraceae</i> NK4A136 group | (3S)-3',7-Dihydroxy-2',4',5',8-tetramethoxyisoflavan                                                                                                                                                                                                                                                                                                                       | + | T2D vs. IGR |
|                                      | 1 $\alpha$ ,25-Dihydroxy-22-oxavitamin                                                                                                                                                                                                                                                                                                                                     | - | T2D vs. IGR |
| <i>Butyricicoccus</i>                | PI (O-20:0/18:0), 3Z,6Z,9Z,12Z,15Z,19Z,22Z,25Z,28Z-Hentriacontanonaene, GalNAc $\beta$ 1-4Gal $\beta$ 1-4Glc $\beta$ -Cer(d18:1/24:1(15Z)), TG (15:0/15:0/15:0), SM(d18:1/24:0), PG (O-20:0/21:0), 10Z-Pentacosene, 21-Methyl-8Z-pentatriacontene, (6S)-Dehydrovomifoliol                                                                                                  | + | IGR vs. NGT |
| <i>Bacteroides</i>                   | $\gamma$ -Glutamylglutamine, L-Lysine, MGDG (20:5(5Z,8Z,11Z,14Z,17Z)/18:3(9Z,12Z,15Z))                                                                                                                                                                                                                                                                                     | + | IGR vs. NGT |
| <i>Lachnoclostridium</i>             | L-Lysine                                                                                                                                                                                                                                                                                                                                                                   | + | IGR vs. NGT |
| <i>Roseburia</i>                     | 1 $\alpha$ ,25-Dihydroxy-22-oxavitamin                                                                                                                                                                                                                                                                                                                                     | + | IGR vs. NGT |
| <i>Faecalibacterium</i>              | L-Tyrosine, DL-2-hydroxy, 21-Methyl-8Z-pentatriacontene                                                                                                                                                                                                                                                                                                                    | + | IGR vs. NGT |
| <i>Blautia</i>                       | 5 $\alpha$ -Cholestane-3 $\alpha$ ,7 $\alpha$ ,12 $\alpha$ ,23,25-pentol                                                                                                                                                                                                                                                                                                   | + | IGR vs. NGT |
| <i>Coproccoccus</i> 1                | L-Lysine, Scillaren                                                                                                                                                                                                                                                                                                                                                        | + | IGR vs. NGT |
| <i>Fusicatenibacter</i>              | $\gamma$ -Glutamylglutamine, L-Tyrosine, L-Lysine                                                                                                                                                                                                                                                                                                                          | + | IGR vs. NGT |

|                                            |                                                                                                                                                                                                                                                            |   |             |
|--------------------------------------------|------------------------------------------------------------------------------------------------------------------------------------------------------------------------------------------------------------------------------------------------------------|---|-------------|
| <i>Subdoligranulum</i>                     | 7-Dehydro-desmosterol, 24-Keto-25dehydrocholesterol, Simvastatin, 5a-Cholestane-3a,7a,12a,23,25-pentol, (22S)-1a,22,25-Trihydroxy-23,24-tetradecahydro-24a-homo-20-epivitamin, PA (14:1/(9Z)/0:0), Manoalide, PA (17:0/21:0), Teasterone, Hippuristanolide | + | IGR vs. NGT |
| <i>Collinsella</i>                         | Afrormosin, PG (P-16:0/15:0)                                                                                                                                                                                                                               | + | IGR vs. NGT |
| <i>Ruminococcus torques</i> group          | 2-Methyl-tridecanedioic, 27-Nor-campestan-3β,4β,5a,6a,7β,8β,14a,15a,24-nonol, LysoPC (14:1(9Z))                                                                                                                                                            | + | IGR vs. NGT |
| <i>Eubacterium hallii</i> group            | L-Tyrosine, L-Lysine                                                                                                                                                                                                                                       | + | IGR vs. NGT |
| <i>Eubacterium rectale</i> group           | L-Lysine, Dodecanedioic, (+)-Cucurbitic acid                                                                                                                                                                                                               | + | IGR vs. NGT |
| <i>Eubacterium coprostanoligenes</i> group | 7-Dehydro-desmosterol, 24-Keto-25dehydrocholesterol, Simvastatin, 5a-Cholestane-3a,7a,16a,26-tetrol, 5a-Cholestane-3a,7a,12a,23,25-pentol, Scillaren, PA (14:1/(9Z)/0:0), Manoalide, PA (17:0/21:0), Hippuristanolide                                      | + | IGR vs. NGT |
| <i>Lachnospiraceae</i> UCG-004             | 1a,25-Dihydroxy-22-oxavitamin                                                                                                                                                                                                                              | + | IGR vs. NGT |
| <i>Lachnospiraceae</i> NC2004 group        | L-Lysine, DL-2-hydroxy, Enkephalin, Ptilosteroid, 7E,9E,11-Dodecatrienyl, Hexacosanoic, Hexacosanedioic, Artonin, Viscutin                                                                                                                                 | + | IGR vs. NGT |
| <i>Lachnospiraceae</i> ND3007 group        | L-Lysine                                                                                                                                                                                                                                                   | + | IGR vs. NGT |
| <i>Lachnospiraceae</i> NK4A136 group       | L-Tyrosine, 7-Dehydro-desmosterol, 24-Keto-25dehydrocholesterol, Simvastatin, 5a-Cholestane-3a,7a,16a,26-tetrol, 5a-Cholestane-3a,7a,12a,23,25-pentol, Scillaren                                                                                           | + | IGR vs. NGT |
| <i>Bifidobacterium</i>                     | Cristacarpin                                                                                                                                                                                                                                               | + | T2D vs. NGT |
| <i>Bacteroides</i>                         | 12,13-Dihydroxy-11-methoxy-9-octadecenoic acid, Cer (d18:0/h 17:0)                                                                                                                                                                                         | + | T2D vs. NGT |
| <i>Parabacteroides</i>                     | 12,13-Dihydroxy-11-methoxy-9-octadecenoic acid, Cer (d18:0/h 17:0)                                                                                                                                                                                         | + | T2D vs. NGT |
| <i>Intestinibacter</i>                     | 12,13-Dihydroxy-11-methoxy-9-octadecenoic acid                                                                                                                                                                                                             | + | T2D vs. NGT |
| <i>Subdoligranulum</i>                     | 12,13-Dihydroxy-11-methoxy-9-octadecenoic acid, Cer (d18:0/h 17:0)                                                                                                                                                                                         | + | T2D vs. NGT |
| <i>Fusicatenibacter</i>                    | 12,13-Dihydroxy-11-methoxy-9-octadecenoic acid                                                                                                                                                                                                             | + | T2D vs. NGT |
| <i>Ruminococcaceae</i> UCG-005             | Piceid, γ-Glutamylglutamine                                                                                                                                                                                                                                | + | T2D vs. NGT |



|                                                                                                                                                                              |                                                     |                                                                                  |                |             |
|------------------------------------------------------------------------------------------------------------------------------------------------------------------------------|-----------------------------------------------------|----------------------------------------------------------------------------------|----------------|-------------|
|                                                                                                                                                                              | <i>Lachnospiraceae</i> NK4A136 group                | Cristacarpin, 24-Keto-25dehydrocholesterol, 5a-Cholestane-3a,7a,12a,23,25-pentol | +              | T2D vs. NGT |
| [110]<br><i>n</i> = 9180; <i>n</i> = 759<br>HCHS/SOL<br>participants<br>Serum                                                                                                | <i>Ruminococcus, Flavonifractor, Faecalitalea,</i>  | Indolepropionate                                                                 | +, -, +, ↓ T2D |             |
|                                                                                                                                                                              | <i>Lachnoclostridium, Faecalibacterium,</i>         |                                                                                  | -, +, +,       |             |
|                                                                                                                                                                              | <i>Subdoligranulum, Clostridium,</i>                |                                                                                  | +, +, +,       |             |
|                                                                                                                                                                              | <i>Lachnoanaerobaculum, Intestinimonas,</i>         |                                                                                  | -, +, +,       |             |
|                                                                                                                                                                              | <i>Erysipelatoclostridium, Cellulomonas,</i>        |                                                                                  | +, +, +,       |             |
|                                                                                                                                                                              | <i>Eubacterium, Fournierella, Dorea,</i>            |                                                                                  | -, +, +,       |             |
|                                                                                                                                                                              | <i>Butyrivibrio, Eggerthella,</i>                   |                                                                                  | +, -, +,       |             |
|                                                                                                                                                                              | <i>Pseudoflavonifractor, Bifidobacterium,</i>       |                                                                                  |                |             |
|                                                                                                                                                                              | <i>Porphyromonas, Parabacteroides, Bittarella,</i>  | Indoleacetate                                                                    | ND             | ND          |
|                                                                                                                                                                              | <i>Cellulomonas, Fournierella,</i>                  |                                                                                  |                |             |
| [111]<br><i>n</i> = 69; HC <i>n</i> = 40; Pseudomonadaceae<br>Non-PN SBS <i>n</i> =<br>5; SBS I <i>n</i> = 10; Staphylococcaceae<br>SBS II <i>n</i> = 14<br>Faeces and serum | <i>Methanobrevibacter, Anaerostipes,</i>            |                                                                                  |                |             |
|                                                                                                                                                                              | <i>Catenibacterium</i>                              |                                                                                  |                |             |
|                                                                                                                                                                              | <i>Faecalitalea, Pseudoflavonifractor,</i>          | Indoxyl sulfate                                                                  | ND             | ND          |
|                                                                                                                                                                              | <i>Parabacteroides, Alistipes, Akkermansia,</i>     |                                                                                  |                |             |
|                                                                                                                                                                              | <i>Faecalicatena, Intestinibacter, Odoribacter,</i> |                                                                                  |                |             |
|                                                                                                                                                                              | <i>Gordonibacter, Sanguibacteroides,</i>            |                                                                                  |                |             |
|                                                                                                                                                                              | <i>Anaerotruncus</i>                                |                                                                                  |                |             |
|                                                                                                                                                                              |                                                     | 2-Pentyl furan, Nonanal, Dodecanoic acid, Decanoic acid,                         | +              | SBS         |
|                                                                                                                                                                              |                                                     | Chenodeoxycholic acid, Deoxycholic acid                                          |                |             |
|                                                                                                                                                                              |                                                     | Pentanoic acid, Butanoic acid, Lithocholic acid                                  | -              | HC          |
| Enterococcaceae                                                                                                                                                              |                                                     | 2-Pentyl furan, Hexanal, Octanal, Decanoic acid, Taurocholic acid,               | +              | SBS         |
|                                                                                                                                                                              |                                                     | Chenodeoxycholic acid, Deoxycholic acid                                          |                |             |
|                                                                                                                                                                              |                                                     | γ-Undecalactone, Geranyl acetone, Butanoic acid                                  | -              | HC          |
|                                                                                                                                                                              |                                                     | 2-Pentyl furan, Hexanal, Octanal, Nonanal, Decanoic acid,                        | +              | SBS         |
|                                                                                                                                                                              |                                                     | Chenodeoxycholic acid, Deoxycholic acid                                          |                |             |
|                                                                                                                                                                              |                                                     | Indole, γ-Undecalactone, Geranyl acetone, Pentanoic acid,                        | -              | HC          |
|                                                                                                                                                                              |                                                     | Butanoic acid, Lithocholic acid                                                  |                |             |
|                                                                                                                                                                              |                                                     | 2-Pentyl furan, Hexanal, Octanal, Nonanal, Taurocholic acid,                     | +              | SBS         |
| Fusobacteriaceae                                                                                                                                                             |                                                     | Chenodeoxycholic acid, Deoxycholic acid                                          |                |             |
|                                                                                                                                                                              |                                                     |                                                                                  |                |             |

|                    |                                                                                                                                                                                                 |   |     |
|--------------------|-------------------------------------------------------------------------------------------------------------------------------------------------------------------------------------------------|---|-----|
| Enterobacteriaceae | γ-Undecalactone, Geranyl acetone, Pentanoic acid, Butanoic acid                                                                                                                                 | - | HC  |
|                    | 2-Pentyl furan, Hexanal, Octanal, Nonanal, Dodecanoic acid, Decanoic acid, Taurocholic acid, Chenodeoxycholic acid, Deoxycholic acid, Cholic acid, Glycocholic acid, Glycochenodeoxycholic acid | + | SBS |
| Lactobacillaceae   | γ-Undecalactone, p-Cresol, 1-Nonanol, Pentanoic acid, Butanoic acid, Lithocholic acid                                                                                                           | - | HC  |
|                    | 2-Pentyl furan, Hexanal, Octanal, Nonanal, Dodecanoic acid, Decanoic acid, Taurocholic acid, Chenodeoxycholic acid, Deoxycholic acid, Cholic acid                                               | + | SBS |
| Streptococcaceae   | Indole, γ-Undecalactone, Geranyl acetone, p-Cresol, 1-Nonanol, Pentanoic acid, Butanoic acid, Lithocholic acid                                                                                  | - | HC  |
|                    | 2-Pentyl furan, Hexanal, Octanal, Nonanal, Dodecanoic acid, Decanoic acid, Taurocholic acid, Chenodeoxycholic acid, Deoxycholic acid, Glycochenodeoxycholic acid                                | + | SBS |
| Clostridiaceae     | Indole, γ-Undecalactone, Geranyl acetone, p-Cresol, 1-Nonanol, Pentanoic acid, Butanoic acid, Lithocholic acid                                                                                  | - | HC  |
|                    | Butanoic acid, 1-Nonanol                                                                                                                                                                        | + | HC  |
| Coriobacteriaceae  | 2-Pentyl furan, Hexanal, Octanal, Nonanal, Dodecanoic acid, Decanoic acid, Chenodeoxycholic acid, Deoxycholic acid, Glycodeoxycholic acid                                                       | - | SBS |
|                    | Pentanoic acid, p-Cresol, Lithocholic acid                                                                                                                                                      | + | HC  |
| Rikenellaceae      | 2-Pentyl furan, Hexanal, Octanal, Nonanal, Dodecanoic acid, Phenol, Taurocholic acid, Chenodeoxycholic acid, Deoxycholic acid                                                                   | - | SBS |
|                    | Butanoic acid, Pentanoic acid, 1-Nonanol, p-Cresol, Geranyl acetone, γ-Undecalactone, Indole, Lithocholic acid                                                                                  | + | HC  |
|                    | 2-Pentyl furan, Hexanal, Octanal, Nonanal, Dodecanoic acid, Decanoic acid, Phenol, Taurocholic acid, Chenodeoxycholic acid, Deoxycholic acid, Glycochenodeoxycholic acid                        | - | SBS |

|                    |                                                                                                                                                                                                 |   |     |
|--------------------|-------------------------------------------------------------------------------------------------------------------------------------------------------------------------------------------------|---|-----|
| Ruminococcaceae    | Butanoic acid, Pentanoic acid, 1-Nonanol, p-Cresol, Geranyl acetone, $\gamma$ -Undecalactone, Lithocholic acid                                                                                  | + | HC  |
|                    | 2-Pentyl furan, Hexanal, Octanal, Nonanal, Dodecanoic acid, Decanoic acid, Taurocholic acid, Chenodeoxycholic acid, Deoxycholic acid, Cholic acid, Glycocholic acid, Glycochenodeoxycholic acid | - | SBS |
| Barnesiellaceae    | Butanoic acid, Pentanoic acid, 1-Nonanol, p-Cresol, Geranyl acetone, $\gamma$ -Undecalactone, Indole, Lithocholic acid                                                                          | + | HC  |
|                    | 2-Pentyl furan, Hexanal, Octanal, Nonanal, Dodecanoic acid, Decanoic acid, Taurocholic acid, Chenodeoxycholic acid, Deoxycholic acid, Cholic acid, Glycocholic acid, Glycochenodeoxycholic acid | - | SBS |
| Odoribacteraceae   | Butanoic acid, Pentanoic acid, 1-Nonanol, p-Cresol, Geranyl acetone, $\gamma$ -Undecalactone, Lithocholic acid                                                                                  | + | HC  |
|                    | 2-Pentyl furan, Hexanal, Octanal, Nonanal, Dodecanoic acid, Decanoic acid, Taurocholic acid, Chenodeoxycholic acid, Deoxycholic acid, Cholic acid, Glycochenodeoxycholic acid                   | - | SBS |
| Porphyromonadaceae | Butanoic acid, Pentanoic acid, 1-Nonanol, p-Cresol, Lithocholic acid                                                                                                                            | + | HC  |
|                    | 2-Pentyl furan, Hexanal, Octanal, Nonanal, Dodecanoic acid, Decanoic acid, Chenodeoxycholic acid, Deoxycholic acid                                                                              | - | SBS |
| Paraprevotellaceae | Butanoic acid, Pentanoic acid, 1-Nonanol, p-Cresol, $\gamma$ -Undecalactone, Lithocholic acid                                                                                                   | + | HC  |
|                    | 2-Pentyl furan, Hexanal, Octanal, Nonanal, Dodecanoic acid, Decanoic acid, Taurocholic acid, Chenodeoxycholic acid, Deoxycholic acid                                                            | - | SBS |
| Prevotellaceae     | Butanoic acid, Pentanoic acid, 1-Nonanol, p-Cresol, Geranyl acetone, Lithocholic acid                                                                                                           | + | HC  |
|                    | 2-Pentyl furan, Hexanal, Octanal, Nonanal, Dodecanoic acid, Decanoic acid, Chenodeoxycholic acid, Deoxycholic acid, Glycochenodeoxycholic acid                                                  | - | SBS |

|                                                                      |                               |                                                                                                                                                                                    |   |          |
|----------------------------------------------------------------------|-------------------------------|------------------------------------------------------------------------------------------------------------------------------------------------------------------------------------|---|----------|
| S24 7                                                                |                               | Butanoic acid, p-Cresol, Geranyl acetone, Lithocholic acid                                                                                                                         | + | HC       |
|                                                                      |                               | 2-Pentyl furan, Hexanal, Octanal, Nonanal, Dodecanoic acid, Decanoic acid, Chenodeoxycholic acid, Deoxycholic acid, Cholic acid                                                    | - | SBS      |
| Alcaligenaceae                                                       |                               | Butanoic acid, Pentanoic acid, 1-Nonanol, p-Cresol, γ-Undecalactone, Indole                                                                                                        | + | HC       |
|                                                                      |                               | Dodecanoic acid, Decanoic acid, Taurocholic acid, Chenodeoxycholic acid, Glycocholic acid                                                                                          | - | SBS      |
| Bacteroidaceae                                                       |                               | Butanoic acid, Pentanoic acid, 1-Nonanol, p-Cresol, γ-Undecalactone, Indole, Lithocholic acid                                                                                      | + | HC       |
|                                                                      |                               | 2-Pentyl furan, Hexanal, Octanal, Nonanal, Dodecanoic acid, Decanoic acid, Taurocholic acid, Chenodeoxycholic acid, Deoxycholic acid, Glycocholic acid, Glycochenodeoxycholic acid | - | SBS      |
| Lachnospiraceae                                                      |                               | Butanoic acid, Pentanoic acid, 1-Nonanol, p-Cresol, Geranyl acetone, γ-Undecalactone, Indole, Lithocholic acid                                                                     | + | HC       |
|                                                                      |                               | 2-Pentyl furan, Hexanal, Octanal, Nonanal, Dodecanoic acid, Decanoic acid, Taurocholic acid, Chenodeoxycholic acid, Deoxycholic acid, Glycocholic acid, Glycochenodeoxycholic acid | - | SBS      |
| Clostridiales                                                        |                               | Butanoic acid, Pentanoic acid, 1-Nonanol, p-Cresol, Geranyl acetone, γ-Undecalactone, Lithocholic acid                                                                             | + | HC       |
|                                                                      |                               | 2-Pentyl furan, Hexanal, Octanal, Nonanal, Dodecanoic acid, Decanoic acid, Phenol, Taurocholic acid, Chenodeoxycholic acid, Deoxycholic acid, Glycochenodeoxycholic acid           | - | SBS      |
| [112]<br>n = 155; Non-IBD<br>n=34; CD n = 68;<br>UC n = 53<br>Faeces | <i>Eubacterium ventriosum</i> | Urobilin, 4-Methylcatechol                                                                                                                                                         | + | non-IBD  |
|                                                                      |                               | Eicosatrienoic acid                                                                                                                                                                | - | IBD:CD   |
|                                                                      | <i>Coproccoccus catus</i>     | Urobilin                                                                                                                                                                           | + | Non-IBD  |
|                                                                      |                               | Eicosatrienoic acid                                                                                                                                                                | - | IBD:CD   |
|                                                                      | <i>Roseburia hominis</i>      | Urobilin, Dodecanedioic acid                                                                                                                                                       | + | Non -IBD |
|                                                                      |                               | Eicosatrienoic acid                                                                                                                                                                | - | IBD:CD   |
|                                                                      | <i>Dorea longicatena</i>      | Urobilin                                                                                                                                                                           | + | Non -IBD |
|                                                                      | <i>Eubacterium hallii</i>     | Urobilin, 3-Methyladipate-pimelate                                                                                                                                                 | + | Non -IBD |

|                                     |                                                                                           |   |           |
|-------------------------------------|-------------------------------------------------------------------------------------------|---|-----------|
|                                     | Linoleoyl ethanolamide, Docosapentaenoic acid, Eicosatrienoic acid                        | - | IBD:CD    |
| <i>Eubacterium siraeum</i>          | C14 carnitine, C3-DC-CH3 carnitine                                                        | - | IBD:CD+UC |
|                                     | Dodecanedioic acid                                                                        | + | Non -IBD  |
| <i>Alistipes shahii</i>             | N-Acetylputrescine, Phytosphingosine                                                      | - | IBD:CD    |
|                                     | Urobilin                                                                                  | + | Non -IBD  |
| <i>Alistipes putredinis</i>         | C3-DC-CH3 carnitine                                                                       | - | IBD:CD+UC |
|                                     | Urobilin                                                                                  | + | Non -IBD  |
| <i>Alistipes finegoldii</i>         | Taurine                                                                                   | - | IBD:CD    |
|                                     | 5 $\alpha$ -Cholesterol                                                                   | + | Non -IBD  |
| <i>Roseburia inulinivorans</i>      | Cholate, Chenodeoxycholate                                                                | - | IBD:CD    |
|                                     | Urobilin, 4-Methylcatechol, Cholestenone                                                  | + | Non -IBD  |
| <i>Roseburia intestinalis</i>       | 2-Hydroxyphenethylamine, Linoleoyl ethanolamide, Eicosatrienoic acid                      | - | IBD:CD    |
|                                     | Urobilin, Hydrocinnamic acid                                                              | + | Non -IBD  |
|                                     | Linoleoyl ethanolamide                                                                    | - | IBD:CD    |
| <i>Faecalibacterium prausnitzii</i> | C14 carnitine                                                                             | - | IBD:CD+UC |
|                                     | Urobilin                                                                                  | + | Non -IBD  |
| <i>Eubacterium aligens</i>          | 2-Hydroxyphenethylamine                                                                   | - | IBD:CD    |
|                                     | Linoleoyl ethanolamide, Palmitoylethanolamide, Docosapentaenoic acid, Eicosatrienoic acid | - | IBD:CD    |
| <i>Bacteroidales bacterium ph8</i>  | Urobilin                                                                                  | + | Non -IBD  |
|                                     | C3-DC-CH3 carnitine                                                                       | - | IBD:CD+UC |
| <i>Alistipes indistinctus</i>       | Dodecanedioic acid                                                                        | + | Non -IBD  |
| <i>Alistipes senegalensis</i>       | Linoleoyl ethanolamide, C18:0 CE                                                          | - | IBD:CD    |
| <i>Ruminococcus callidus</i>        | Caproic acid                                                                              | + | Non -IBD  |
| <i>Holdemania filiformis</i>        | Urobilin, Cholestenone                                                                    | + | Non -IBD  |
|                                     | C14 carnitine                                                                             | - | IBD:CD+UC |
| <i>Gordonibacter pamelaee</i>       | Pipecolic acid                                                                            | + | Non -IBD  |
|                                     | Cholate, Chenodeoxycholate                                                                | - | IBD:CD    |
| <i>Lachnospiraceae bacterium</i>    | Urobilin, Pipecolic acid, 2-Hydroxyhexadecanoate, Cholestenone                            | + | Non -IBD  |

|                                  |                                    |                                                                   |   |           |
|----------------------------------|------------------------------------|-------------------------------------------------------------------|---|-----------|
|                                  | <i>Adlercreutzia equolifaciens</i> | ADMA, Cholate                                                     | - | IBD:CD    |
|                                  |                                    | Urobilin, Cholestenone, 5α-Cholesterol, 3-Methyladipate-pimelate+ |   | Non -IBD  |
|                                  |                                    | 2-Hydroxyphenethylamine, N-Acetylputrescine, ADMA, Cholate, -     |   | IBD:CD    |
|                                  |                                    | Chenodeoxycholate                                                 |   |           |
|                                  | <i>Alistipes onderdonkii</i>       | C14 carnitine                                                     | - | IBD:CD+UC |
|                                  |                                    | Urobilin, 2-Hydroxyhexadecanoate, Cholestenone, 5α-               | + | Non -IBD  |
|                                  |                                    | Cholesterol, Dodecanedioic acid, 3-Methyladipate-pimelate,        |   |           |
|                                  |                                    | Undecanedionate, Azelaic acid                                     |   |           |
|                                  |                                    | Taurine                                                           | - | IBD:CD    |
|                                  |                                    | C14 carnitine                                                     | - | IBD:CD+UC |
|                                  | <i>Blautia producta</i>            | Docosapentaenoic acid, Eicosatrienoic acid                        | + | IBD:CD    |
|                                  | <i>Lactobacillus gasseri</i>       | Taurine                                                           | + | IBD:CD    |
|                                  |                                    | Carnosol                                                          | - | Non -IBD  |
|                                  | <i>Enterococcus faecium</i>        | 2-Hydroxyphenethylamine                                           | + | IBD:CD    |
|                                  | <i>Lachnospiraceae bacterium</i>   | Docosapentaenoic acid                                             | + | IBD:CD    |
|                                  | <i>Clostridium clostridioforme</i> | Docosapentaenoic acid, Eicosatrienoic acid                        | + | IBD:CD    |
|                                  |                                    | Carnosol, Urobilin                                                | - | Non -IBD  |
|                                  | <i>Roseburia gnavus</i>            | Docosapentaenoic acid, Eicosatrienoic acid                        | + | IBD:CD    |
|                                  |                                    | Caprylic acid, 5α-Cholesterol, Caproic acid                       | - | Non -IBD  |
| [113]                            | <i>Clostridium</i>                 | Glycine, Homocysteine                                             | + | IBS       |
| <i>n</i> = 30; HC <i>n</i> = 15; | <i>Lachnospira</i>                 | Homocysteine                                                      | + |           |
| IBS <i>n</i> = 15                | <i>Haemophilus</i>                 | Homocysteine                                                      | + |           |
| Faeces                           | <i>Corynebacterium</i>             | Homocysteine                                                      | - |           |
|                                  | <i>Lachnospiraceae</i>             | Homocysteine                                                      | - |           |
| [114]                            | <i>Ruminococcus gnavus</i> group   | Glycoprotein acetyls                                              | + | Steatosis |
| <i>n</i> = 1355; No-             |                                    |                                                                   |   |           |
| Steatosis <i>n</i> = 883;        |                                    |                                                                   |   |           |
| Steatosis <i>n</i> = 472         |                                    |                                                                   |   |           |
| Serum                            |                                    |                                                                   |   |           |
| [115]                            | <i>Gemmiger formicilis</i>         | Lithocholic acid                                                  | + | NAFLD     |

*n* = 68; HC *n* = 36;  
NAFLD *n* = 32

|                                 |                                                                                                                                                                                                                                                                                                                                                                                                |   |
|---------------------------------|------------------------------------------------------------------------------------------------------------------------------------------------------------------------------------------------------------------------------------------------------------------------------------------------------------------------------------------------------------------------------------------------|---|
|                                 | 7-Dehydrocholic acid, 3-Dehydrocholic acid, Cholic acid, Chenodeoxycholic acid, 12-Dehydrocholic acid, 3 $\beta$ -cholic acid, $\beta$ Muricholic acid, Allocholic acid, 6-Keto-Lithocholic acid, Ursodeoxycholic acid, Taurohyocholic acid, Tauroursodeoxycholic acid, Chenodeoxycholic acid-3Gln, Taurocholic acid, Glycocholic acid, Glycochenodeoxycholic acid, 6,7-Diketolithocholic acid | - |
| <i>Ruminococcus bicirculans</i> | 7,12-Diketolithocholic acid, 7-Ketolithocholic acid, Lithocholic acid, Hyodeoxycholic acid, Nordeoxycholic acid                                                                                                                                                                                                                                                                                | + |
| <i>Neglecta timonensis</i>      | 7,12-Diketolithocholic acid, 7-Ketolithocholic acid, Lithocholic acid, Glycolithocholic acid, $\beta$ Deoxycholic acid, Nordeoxycholic acid                                                                                                                                                                                                                                                    | + |
|                                 | 7-Dehydrocholic acid, 3-Dehydrocholic acid, Cholic acid, Chenodeoxycholic acid, 12-Dehydrocholic acid, Taurohyocholic acid, Chenodeoxycholic acid-3Gln, Taurocholic acid                                                                                                                                                                                                                       | - |
| <i>Oscillibacter sp.</i>        | 7,12-Diketolithocholic acid, 7-Ketolithocholic acid, Lithocholic acid, Glycolithocholic acid, Dehydrocholic acid, $\beta$ Deoxycholic acid, Hyodeoxycholic acid, Nordeoxycholic acid                                                                                                                                                                                                           | + |
|                                 | 3-Dehydrocholic acid, Cholic acid, Chenodeoxycholic acid, Murocholic acid, Taurocholic acid                                                                                                                                                                                                                                                                                                    | - |
| <i>Enterobacter cloacae</i>     | Chenodeoxycholic acid-3Gln                                                                                                                                                                                                                                                                                                                                                                     | + |
|                                 | 7,12-Diketolithocholic acid, Hyodeoxycholic acid                                                                                                                                                                                                                                                                                                                                               | - |
| <i>Escherichia coli</i>         | Glycocholic acid                                                                                                                                                                                                                                                                                                                                                                               | + |
|                                 | 7,12-Diketolithocholic acid, 7-Ketolithocholic acid, Lithocholic acid, $\beta$ Deoxycholic acid, Hyodeoxycholic acid, Nordeoxycholic acid                                                                                                                                                                                                                                                      | - |
| <i>Eubacterium sp.</i>          | 7,12-Diketolithocholic acid                                                                                                                                                                                                                                                                                                                                                                    | + |
|                                 | Glycolithocholic acid-3S, Chenodeoxycholic acid-3Gln, Taurodeoxycholic acid                                                                                                                                                                                                                                                                                                                    | - |
| <i>Bacteroides intestinalis</i> | Taurolithocholic acid, 6,7-Diketolithocholic acid                                                                                                                                                                                                                                                                                                                                              | + |

|                                  |                                          |                                                                                                                                                                                                               |   |       |
|----------------------------------|------------------------------------------|---------------------------------------------------------------------------------------------------------------------------------------------------------------------------------------------------------------|---|-------|
|                                  | <i>Akkermansia muciniphila</i>           | 7,12-Diketolithocholic acid, 7-Ketolithocholic acid, Lithocholic acid, Glycolithocholic acid, Deoxycholic acid, Dehydrocholic acid, $\beta$ Deoxycholic acid, Glycodeoxycholic acid, $\alpha$ Muricholic acid | - |       |
|                                  | <i>Eubacterium</i> sp.                   | 7,12-Diketolithocholic acid, 7-Ketolithocholic acid, Lithocholic acid                                                                                                                                         | + |       |
| [116]                            | <i>Ruminococcus</i>                      | 2-Butanone                                                                                                                                                                                                    | - | NAFLD |
| <i>n</i> = 115; HC <i>n</i> =54; | <i>Coprococcus</i>                       | 4-Methyl-2-pentanone                                                                                                                                                                                          | - | HC    |
| OB <i>n</i> = 8; NAFLD           | <i>Streptococcus</i>                     | 2-Butanone                                                                                                                                                                                                    | - | NAFLD |
| <i>n</i> = 27; NASH <i>n</i> =   | <i>Blautia</i>                           | 4-Methyl-2-pentanone                                                                                                                                                                                          | - | HC    |
| 26                               |                                          | 4-Methyl-2-pentanone                                                                                                                                                                                          | + | NAFLD |
| Faeces                           |                                          |                                                                                                                                                                                                               |   |       |
| [117]                            | <i>Faecalibacterium</i>                  | Steroids, Phosphatidylethanolamine, Phosphatidylcholine, Ceramides, Glycerophospholipid, Potassium chloride                                                                                                   | + | CAD - |
| <i>n</i> = 201; HC <i>n</i> =    | <i>Roseburia</i>                         |                                                                                                                                                                                                               |   |       |
| 40; CAD <i>n</i> = 161           | <i>Oscillibacter</i>                     | Fatty acyls, Carboxylic acids, Benzene/derivatives, Prenol lipids, Glycerolipids, Amino acids (L-Leucine)                                                                                                     | - | CAD + |
| Serum                            | Lachnospiraceae (CAG4)                   |                                                                                                                                                                                                               |   |       |
|                                  | <i>Clostridium</i> IV                    | Potassium chloride, Addictives/ingredients                                                                                                                                                                    | - | CAD - |
|                                  | <i>Alistipes</i>                         |                                                                                                                                                                                                               |   |       |
|                                  | <i>Butyricimonas</i>                     |                                                                                                                                                                                                               |   |       |
|                                  | Clostridiales (CAG5)                     |                                                                                                                                                                                                               |   |       |
|                                  | <i>Escherichia/Shigella</i>              | Phosphatidylethanolamine, Phosphatidylcholine                                                                                                                                                                 | - | CAD - |
|                                  | <i>Bacteroides</i>                       |                                                                                                                                                                                                               |   |       |
|                                  | <i>Dialister</i>                         |                                                                                                                                                                                                               |   |       |
|                                  | Lactobacillaceae                         |                                                                                                                                                                                                               |   |       |
|                                  | <i>Eggerthella</i>                       |                                                                                                                                                                                                               |   |       |
|                                  | <i>Clostridium</i> IV, XIVa, XIVb, XVIII |                                                                                                                                                                                                               |   |       |
|                                  | <i>Flavonifractor</i>                    |                                                                                                                                                                                                               |   |       |
|                                  | <i>Coprobacillus</i>                     |                                                                                                                                                                                                               |   |       |
|                                  | Erysipelotrichaceae incertae sedis       |                                                                                                                                                                                                               |   |       |



|                                               |                                                                                  |   |       |
|-----------------------------------------------|----------------------------------------------------------------------------------|---|-------|
| (CAG9)                                        |                                                                                  |   |       |
| <i>Butyricimonas</i>                          | Fatty acyls, Carboxylic acids, Glycerolipids                                     | + | CAD + |
| <i>Bacteroides</i>                            |                                                                                  |   |       |
| <i>Barnesiella</i>                            |                                                                                  |   |       |
| <i>Coprobacar</i>                             | Addictives/ingredients                                                           | - | CAD - |
| <i>Alistipes</i>                              |                                                                                  |   |       |
| (CAG13)                                       |                                                                                  |   |       |
| <i>Ruminococcus 2</i>                         | Prenol lipids                                                                    | - | CAD + |
| <i>Dorea</i>                                  |                                                                                  |   |       |
| <i>Blautia</i>                                |                                                                                  |   |       |
| <i>Clostridium XVIII</i>                      |                                                                                  |   |       |
| Lachnospiracea incertae sedis                 |                                                                                  |   |       |
| (CAG14)                                       |                                                                                  |   |       |
| <i>Anaerostipes</i>                           | Sphingolipids, Phosphatidylethanolamine, Addictives/ingredients                  | + | CAD - |
| <i>Blautia</i>                                |                                                                                  |   |       |
| Lactobacillaceae                              |                                                                                  |   |       |
| <i>Fusicatenibacter</i>                       | Benzene/derivatives, Glycerolipids                                               | - | CAD + |
| <i>Clostridium XIVa</i>                       |                                                                                  |   |       |
| <i>Gemella</i>                                |                                                                                  |   |       |
| <i>Bifidobacterium</i>                        |                                                                                  |   |       |
| <i>Saccharibacteria genera incertae sedis</i> | Taurine                                                                          | - | CAD - |
| (CAG15)                                       |                                                                                  |   |       |
| <i>Roseburia</i>                              | Addictives/ingredients                                                           | + | CAD - |
| <i>Clostridium XIVb</i>                       |                                                                                  |   |       |
| <i>Parasutterella</i>                         | Fatty acyls, Carboxylic acids, Benzene/derivatives, Prenol lipids, Glycerolipids | - | CAD + |
| <i>Butyricicoccus</i>                         |                                                                                  |   |       |
| Lachnospiracea incertae sedis                 | Taurine                                                                          | - | CAD - |
| (CAG16)                                       |                                                                                  |   |       |
| <i>Oscillibacter</i>                          | Fatty acyl carnitines, Addictives/ingredients                                    | - | CAD - |
| <i>Clostridium IV</i>                         |                                                                                  |   |       |

|                                                                                                                                                                         |                             |                                                                                                                   |   |                |
|-------------------------------------------------------------------------------------------------------------------------------------------------------------------------|-----------------------------|-------------------------------------------------------------------------------------------------------------------|---|----------------|
|                                                                                                                                                                         | (CAG19)                     |                                                                                                                   |   |                |
|                                                                                                                                                                         | <i>Oscillibacter</i>        | Benzene/derivatives                                                                                               | + | CAD +          |
|                                                                                                                                                                         | <i>Clostridium IV, XIVa</i> |                                                                                                                   |   |                |
|                                                                                                                                                                         | (CAG23)                     | Fatty acyl carnitines, Potassium chloride, Addictives/ingredients                                                 | - | CAD -          |
| [118]<br><i>n</i> = 196; HC <i>n</i> = 41; pHT <i>n</i> = 56; HT <i>n</i> = 99<br><i>n</i> = 124; HC <i>n</i> = 30; pHT <i>n</i> = 31; HT <i>n</i> = 63 subset<br>Serum | <i>Butyricicoccus</i>       | PA (12:0/0:0), Hippurin-1                                                                                         | + | HT/HC          |
|                                                                                                                                                                         |                             | LysoPC (18:2)                                                                                                     | - | HC             |
|                                                                                                                                                                         | <i>Intestinimonas</i>       | Na-Acetyl-L-arginine, S-Carboxymethyl-L-cysteine, Hippurin-1                                                      | + | HT/HC/HC       |
|                                                                                                                                                                         |                             | LysoPC (18:2)                                                                                                     | - | HC             |
|                                                                                                                                                                         | <i>Ruminococcus</i>         | Trichloroethanol glucuronide                                                                                      | + | HC             |
|                                                                                                                                                                         |                             | PA (12:0/0:0), 3-Keto stearic acid, LysoPC (18:2), PS(O-18:0/0:0)                                                 | - | HT/HT/HC/HC    |
|                                                                                                                                                                         | <i>Paenibacillus</i>        | 9,10-Dichloro-octadecanoic acid, Petunidin 3-rhamnoside 5-glucoside, Hippurin-1                                   | + | HT/HT/HC       |
|                                                                                                                                                                         |                             | Trichloroethanol glucuronide                                                                                      | - | HC             |
|                                                                                                                                                                         | <i>Lachnoclostridium</i>    | PA (12:0/0:0), 9,10-Dichloro-octadecanoic acid, Petunidin 3-rhamnoside 5-glucoside, 3-Keto stearic acid, Pyridine | + | HT/HT/HT/HT/HC |
|                                                                                                                                                                         |                             | Trichloroethanol glucuronide                                                                                      | - | HC             |
|                                                                                                                                                                         | <i>Butyrivibrio</i>         | Petunidin 3-rhamnoside 5-glucoside                                                                                | + | HT             |
|                                                                                                                                                                         | <i>Faecalibacterium</i>     | Petunidin 3-rhamnoside 5-glucoside, 3-Keto stearic acid                                                           | + | HT/HT          |
|                                                                                                                                                                         | <i>Enterococcus</i>         | 9,10-Dichloro-octadecanoic acid                                                                                   | + | HT             |
|                                                                                                                                                                         | <i>Coprococcus</i>          | Na-Acetyl-L-arginine, Petunidin 3-rhamnoside 5-glucoside                                                          | + | HT/HT          |
|                                                                                                                                                                         | <i>Flavonifractor</i>       | 3-Keto stearic acid                                                                                               | - | HT             |
|                                                                                                                                                                         | <i>Blautia</i>              | PS (O-18:0/0:0)                                                                                                   | + | HC             |
|                                                                                                                                                                         |                             | PA (12:0/0:0), 9,10-Dichloro-octadecanoic acid, 3-Keto stearic acid                                               | - | HT/HT/HT       |
|                                                                                                                                                                         | <i>Bifidobacterium</i>      | Trichloroethanol glucuronide                                                                                      | + | HC             |
|                                                                                                                                                                         |                             | PA (12:0/0:0), 9,10-Dichloro-octadecanoic acid, 3-Keto stearic acid                                               | - | HT/HT/HT       |
|                                                                                                                                                                         | <i>Subdoligranulum</i>      | LysoPC(18:2), Trichloroethanol glucuronide                                                                        | + | HC/HC          |
|                                                                                                                                                                         |                             | PA (12:0/0:0), 9,10-Dichloro-octadecanoic acid, Petunidin 3-rhamnoside 5-glucoside                                | - | HT/HT/HT       |
|                                                                                                                                                                         | <i>Marvinbryantia</i>       | S-Carboxymethyl-L-cysteine, Trichloroethanol glucuronide                                                          | + | HC/HC          |

|                          |                                                                                    |   |             |
|--------------------------|------------------------------------------------------------------------------------|---|-------------|
|                          | PA (12:0/0:0), 9,10-Dichloro-octadecanoic acid, Petunidin 3-rhamnoside 5-glucoside | - | HT/HT/HT    |
| <i>Holdemania</i>        | Na-Acetyl-L-arginine, Pyridine, S-Carboxymethyl-L-cysteine, PS (O-18:0/0:0)        | + | HT/HC/HC/HC |
|                          | PA (12:0/0:0)                                                                      | - | HT          |
| <i>Robinsoniella</i>     | Na-Acetyl-L-arginine, Pyridine, PS(O-18:0/0:0), Trichloroethanol glucuronide       | + | HT/HC/HC/HC |
| <i>Veillonella</i>       | 3-Keto stearic acid, LysoPC(22:5), Pyridine                                        | + | HT/HC/HC    |
|                          | PA (12:0/0:0)                                                                      | - | HT          |
| <i>Clostridium</i>       | 9,10-Dichloro-octadecanoic acid                                                    | - | HT          |
| <i>Oribacterium</i>      | Pyridine                                                                           | + | HC          |
|                          | PA (12:0/0:0), Na-Acetyl-L-arginine, 3-Keto stearic acid, PS (O-18:0/0:0)          | - | HT/HT/HT/HC |
| <i>Bilophila</i>         | Pyridine                                                                           | + | HC          |
|                          | Na-Acetyl-L-arginine, 3-Keto stearic acid                                          | - | HT/HT       |
| <i>Akkermansia</i>       | PA (12:0/0:0), Pyridine, Trichloroethanol glucuronide                              | + | HT/HC/HC    |
|                          | Na-Acetyl-L-arginine                                                               | - | HT          |
| <i>Pyramidobacter</i>    | LysoPC (22:5), Hippurin-1                                                          | + | HC/HC       |
|                          | PA (12:0/0:0), Pyridine                                                            | - | HT/HC       |
| <i>Tyzzerella</i>        | LysoPC (18:2)                                                                      | + | HC          |
|                          | Petunidin 3-rhamnoside 5-glucoside, 3-Keto stearic acid, Pyridine                  | - | HT/HT/HC    |
| <i>Roseburia</i>         | LysoPC (22:5), S-Carboxymethyl-L-cysteine, Hippurin-1                              | + | HC/HC/HC    |
|                          | PA (12:0/0:0), 9,10-Dichloro-octadecanoic acid, Na-Acetyl-L-arginine               | - | HT/HT/HT    |
| <i>Ruminiclostridium</i> | LysoPC (22:5), LysoPC (18:2), Hippurin-1                                           | + | HC/HC/HC    |
|                          | Na-Acetyl-L-arginine, Trichloroethanol glucuronide                                 | - | HT/HC       |
| <i>Oscillibacter</i>     | PA (12:0/0:0)                                                                      | + | HT          |
|                          | Na-Acetyl-L-arginine, LysoPC (22:5), S-Carboxymethyl-L-cysteine                    | - | HT/HC/HC    |
| <i>Treponema</i>         | PA (12:0/0:0)                                                                      | + | HT          |
|                          | LysoPC (22:5), Pyridine, LysoPC (18:2)                                             | - | HC/HC/HC    |
| <i>Peptoclostridium</i>  | PA (12:0/0:0), 9,10-Dichloro-octadecanoic acid                                     | + | HT/HT       |

|                        |                                                                                                                                 |   |                   |
|------------------------|---------------------------------------------------------------------------------------------------------------------------------|---|-------------------|
|                        | S-Carboxymethyl-L-cysteine, Trichloroethanol glucuronide, Hippurin-1                                                            | - | HC/HC/HC          |
| <i>Anaerotruncus</i>   | PA (12:0/0:0), 9,10-Dichloro-octadecanoic acid, PS (O-18:0/0:0), Hippurin-1                                                     | - | HT/HT/HC/HC       |
| <i>Eggerthella</i>     | 3-Keto stearic acid, LysoPC (22:5)                                                                                              | + | HT/HC             |
|                        | PA (12:0/0:0), 9,10-Dichloro-octadecanoic acid, Hippurin-1                                                                      | - | HT/HT/HC          |
| <i>Acidiphilium</i>    | PA (12:0/0:0), 9,10-Dichloro-octadecanoic acid, 3-Keto stearic acid, LysoPC(18:2), PS(O-18:0/0:0), Trichloroethanol glucuronide | + | HT/HT/HT/HC/HC/HC |
|                        | Na-Acetyl-L-arginine, Petunidin 3-rhamnoside 5-glucoside                                                                        | - | HT/HT             |
| <i>Klebsiella</i>      | 9,10-Dichloro-octadecanoic acid, S-Carboxymethyl-L-cysteine                                                                     | + | HT/HC             |
|                        | Hippurin-1                                                                                                                      | - | HC                |
| <i>Azospirillum</i>    | Na-Acetyl-L-arginine                                                                                                            | + | HT                |
|                        | Hippurin-1                                                                                                                      | - | HC                |
| <i>Prevotella</i>      | PA (12:0/0:0), 9,10-Dichloro-octadecanoic acid                                                                                  | + | HT/HT             |
|                        | 3-Keto stearic acid, LysoPC (22:5), Trichloroethanol glucuronide                                                                | - | HT/HC/HC          |
| <i>Dorea</i>           | PA (12:0/0:0), 3-Keto stearic acid                                                                                              | + | HT/HT             |
|                        | 9,10-Dichloro-octadecanoic acid, Trichloroethanol glucuronide                                                                   | - | HT/HC             |
| <i>Acidaminococcus</i> | PA (12:0/0:0)                                                                                                                   | + | HT                |
|                        | Trichloroethanol glucuronide                                                                                                    | - | HC                |
| <i>Enterobacter</i>    | PA (12:0/0:0), 9,10-Dichloro-octadecanoic acid, Petunidin 3-rhamnoside 5-glucoside                                              | + | HT/HT/HT          |
|                        | 3-Keto stearic acid                                                                                                             | - | HT                |
| <i>Streptococcus</i>   | Hippurin-1                                                                                                                      | + | HC                |
|                        | Na-Acetyl-L-arginine, LysoPC (18:2)                                                                                             | - | HT/HC             |
| <i>Porphyromonas</i>   | 9,10-Dichloro-octadecanoic acid, LysoPC (22:5), Pyridine, Hippurin-1                                                            | + | HT/HC/HC/HC       |
|                        | PS (O-18:0/0:0)                                                                                                                 | - | HC                |
| <i>Coprobacillus</i>   | Petunidin 3-rhamnoside 5-glucoside                                                                                              | + | HT                |
|                        | 9,10-Dichloro-octadecanoic acid, LysoPC (22:5), S-Carboxymethyl-L-cysteine                                                      | - | HT/HC/HC          |
| <i>Actinomyces</i>     | 3-Keto stearic acid                                                                                                             | + | HT                |

|                      |                                                                |   |             |
|----------------------|----------------------------------------------------------------|---|-------------|
| <i>Desulfovibrio</i> | PA (12:0/0:0), 9,10-Dichloro-octadecanoic acid, LysoPC (22:5), | - | HT/HT/HC/HC |
|                      | Pyridine                                                       |   |             |
|                      | 3-Keto stearic acid                                            | + | HT          |
|                      | Pyridine, Trichloroethanol glucuronide, Hippurin-1             | - | HC/HC/HC    |

CAD: coronary artery disease; CAG: co-abundance group; CD: Crohn's disease; HC: healthy control; HCHS/SOL: Hispanic Community Health Study/Study of Latinos; HT: hypertension; IBD: irritable bowel disease; IBS: irritable bowel syndrome; IGR: impaired glucose regulation; LC: lean control; LH: lean healthy; MLGs: metagenomic linkage groups; MM: microbial modules; NAFLD: non-alcoholic fatty liver disease; NASH: non-alcoholic steatohepatitis; ND: not determined; NGT: normal glucose tolerance; Non-PN SBS: parenteral nutrition-independent short bowel syndrome; NW: normal weight; OB: obese; ObH: obese healthy; OW: overweight; PCOS: polycystic ovary syndrome; p-HT: pre-hypertension; SBS I: parenteral nutrition-dependent short bowel syndrome I; SBS II: parenteral nutrition-dependent short bowel syndrome II; T2D: type 2 diabetes; T2D+: diabetes with chronic complications; T2D-: diabetes without chronic complications; UC: ulcerative colitis.
